# Supplementary material for: Genetic variation in the human leukocyte antigen region confers susceptibility to Clostridioides difficile infection
Source: PubMed Central journal article supplement (PMC10613277; doi:10.1038/s41598-023-45649-4), 2023-10-28

**Title**

Genetic variation in the human leukocyte antigen region confers susceptibility to *Clostridioides difficile* infection

**Authors**

Kathleen Ferar  
Taryn O. Hall  
Dana C. Crawford  
Robb Rowley  
Benjamin A. Satterfield  
Rongling Li  
Loren Gragert  
Elizabeth W. Karlson  
Mariza de Andrade  
Iftikhar J. Kullo  
Catherine A. McCarty  
Abel Kho  
M. Geoffrey Hayes  
Marylyn D. Ritchie  
Paul K. Crane  
Daniel B. Mirel  
Christopher Carlson  
John J. Connolly  
Hakon Hakonarson  
Andrew T. Crenshaw  
David Carrell  
Yuan Luo  
Ozan Dikilitas  
Joshua C. Denny  
Gail P. Jarvik  
David R. Crosslin  
The electronic Medical Records and Genomics (eMERGE) Network

**Supplementary Table S1.** *C. difficile* progress note mentions used by the natural language processing algorithm.

| <b>Mentions</b>                                                                                                                                                                                                             |
|-----------------------------------------------------------------------------------------------------------------------------------------------------------------------------------------------------------------------------|
| difficile colitis<br>diff colitis<br>dif colitis<br>difficile diarrhea<br>diff diarrhea<br>dif diarrhea<br>difficile infection<br>diff infection<br>dif infection<br>difficile enteritis<br>diff enteritis<br>dif enteritis |
| *The commonly used abbreviation for clostridiodes/clostridium is the single letter “c”. This is difficult to implement in a word search or dictionary look up and was therefore omitted from the NLP algorithm.             |

**Supplementary Table S2.** Class 1 (high risk) and Class 2 (moderate risk) antibiotics, as defined by the eMERGE *C. diff.* phenotyping algorithm.

See Excel spreadsheet.

**Supplementary Table S3.** Nursing home mentions used by the natural language processing algorithm.

|                                                                                |
|--------------------------------------------------------------------------------|
| <b>Generic Names</b>                                                           |
| NH<br>NSH<br>nursing home<br>SNF<br>skilled nursing facility<br>Hospice<br>NHC |
| <b>Proper Names (area specific)</b>                                            |
| Cumberland Manor<br>Ida Culver House<br>etc.                                   |

**Supplementary Table S4.** Medications used for case-control exclusion and covariate analysis.

| Transplant Medications                                                                                                                                                                                                                                                                                                                                                                                                   | Corticosteroids                                                                                                                                                                                                                                                                                                                                                                                                                                                                                                                                                                                        | Diabetes Mellitus Medications                                                                                                                                                                                                                 |
|--------------------------------------------------------------------------------------------------------------------------------------------------------------------------------------------------------------------------------------------------------------------------------------------------------------------------------------------------------------------------------------------------------------------------|--------------------------------------------------------------------------------------------------------------------------------------------------------------------------------------------------------------------------------------------------------------------------------------------------------------------------------------------------------------------------------------------------------------------------------------------------------------------------------------------------------------------------------------------------------------------------------------------------------|-----------------------------------------------------------------------------------------------------------------------------------------------------------------------------------------------------------------------------------------------|
| Cellcept<br>munoloc<br>mycophenylate mofetil<br>Tacrolimus<br>fk-506<br>fk5<br>k506<br>tacarolimus<br>tacrolimus hydrate<br>fujimycin<br>lcp-tacro<br>prograf<br>protopic<br>Cyclosporine<br>ciclosporin<br>cyclosporin<br>cyclosporin a<br>gengraf<br>neoral<br>restasis<br>sandimmune<br>sangcya<br>azothioprine<br>azathioprin<br>azathioprine sodium<br>azatioprin<br>azamun<br>azanin<br>azasan<br>ccucol<br>imuran | Cortisone<br>Cortisone Acetate<br>Hydrocortisone<br>Hydrocortisone Sodium Phosphate<br>Hydrocortisone Sodium Succinate<br>Hydrocortisone Acetate<br>Hydrocortisone Cypionate<br>Prednisone<br>Prednisolone<br>Prednisolone Sodium Phosphate<br>Methylprednisolone<br>Methylprednisolone Sodium Succinate<br>Methylprednisolone Acetate<br>Triamcinolone<br>Triamcinolone Acetonide<br>Triamcinolone Diacetate<br>Triamcinolone<br>Hexacetonide<br>Dexamethasone<br>Dexamethasone Acetate<br>Dexamethasone Sodium Phosphate<br>Betamethasone<br>Betamethasone Sodium Phosphate<br>Betamethasone Acetate | Insulin<br>glucagon<br>glucagon-like peptide-1 (GLP-1) receptor agonists<br>biguanides<br>sulfonylurea<br>thiazolidinediones<br>meglitinides<br>biguanides<br>$\alpha$ -glucose inhibitor<br>DPP-4 inhibitors<br>SGLT2 inhibitors<br>Cycloset |

**Supplementary Figure S1.** (Quantile-Quantile) Q-Q plot for logistic regression analysis in the European ancestry sample ( $n=14,620$ ,  $\lambda=1.02$ ). Expected  $P$ -values from a theoretical  $\chi^2$ -distribution are plotted on the X-axis, and observed  $P$ -values for each SNV in the logistic regression model are plotted on the Y-axis. The red line represents the null hypothesis that the theoretical and observed  $P$ -values correspond with one another.

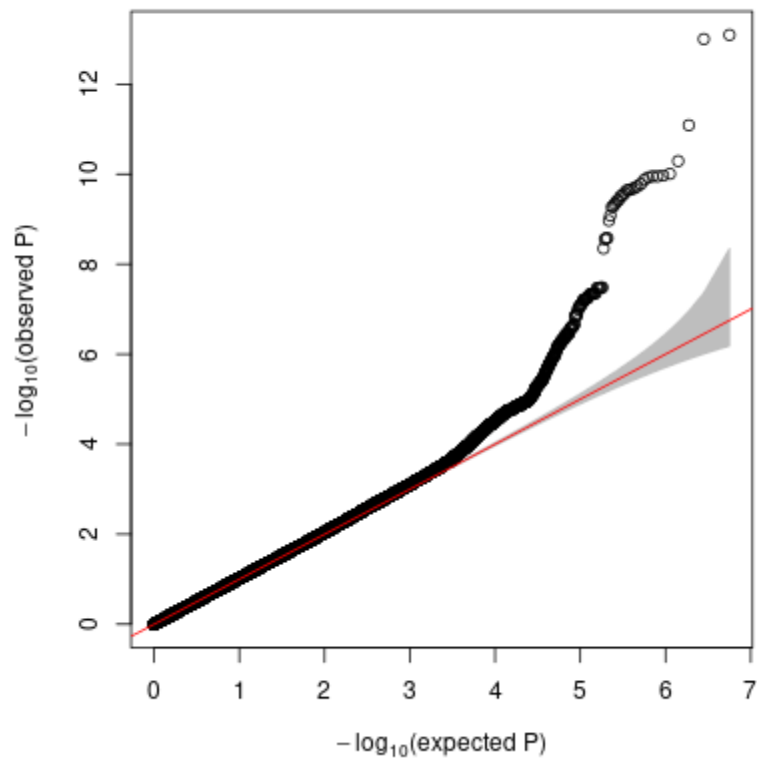

**Supplementary Figure S2.** Manhattan plot of  $P$ -values generated using logistic regression analysis in the joint ancestry sample ( $n=19,861$ ). An additive model was used to assess the disease susceptibility impact of the minor (coded) allele at each position, while controlling for age, BMI, sex, ancestry, nursing home status, chemotherapy, diabetes, HIV, transplant medications, corticosteroids, and medium or high-risk antibiotic exposure as covariates. Genomic coordinates are displayed along the X-axis, and the negative logarithm of logistic regression  $P$ -values are displayed on the Y-axis. Each dot represents a SNV in the regression model, with associated  $P$ -values plotted accordingly, while the diamond represents the most significantly associated SNV. The dotted line represents the negative logarithm of the genome-wide significance threshold ( $P < 5 \times 10^{-8}$ ). Colors are used to distinguish between SNVs in adjacent chromosomes.

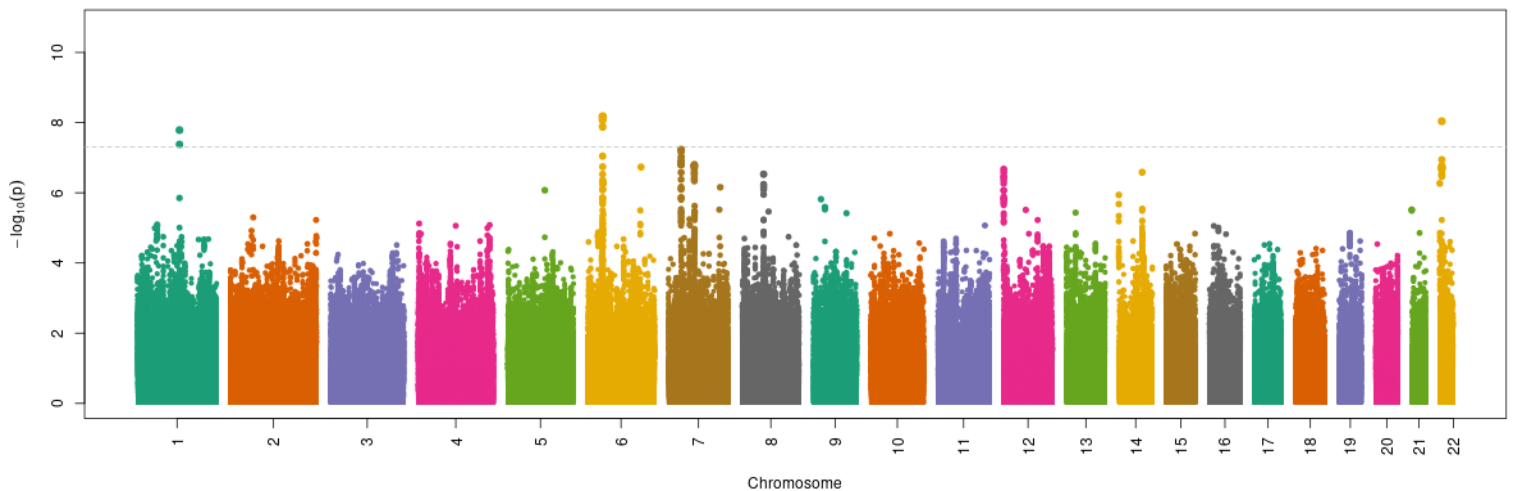

**Supplementary Figure S3.** Q-Q plot for logistic regression analysis in the joint ancestry sample ( $n=19,861$ ,  $\lambda=1.04$ ). Expected  $P$ -values from a theoretical  $\chi^2$ -distribution are plotted on the X-axis, and observed  $P$ -values for each SNV in the logistic regression model are plotted on the Y-axis. The red line represents the null hypothesis that the theoretical and observed  $P$ -values correspond with one another.

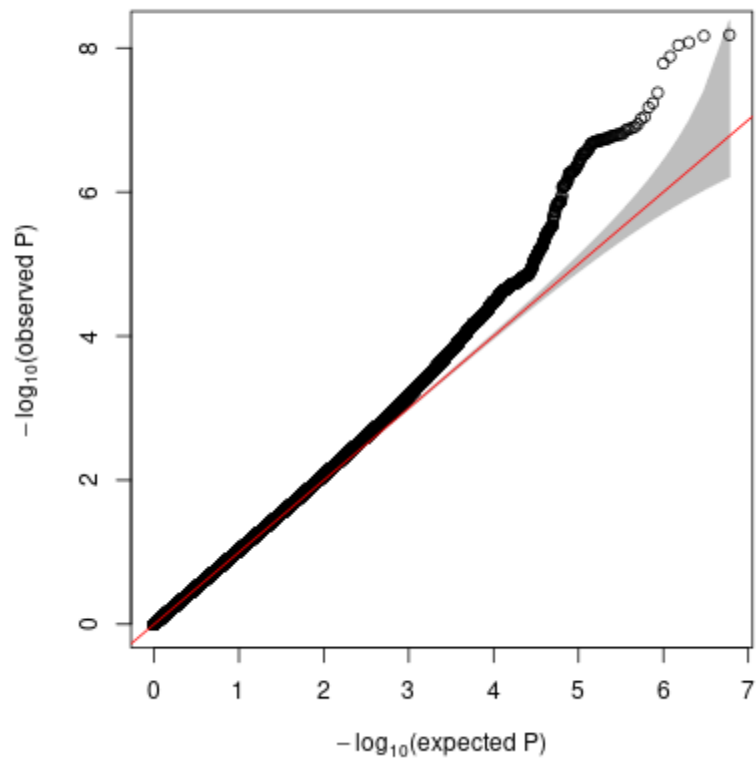

**Supplementary Figure S4.** Manhattan plot of  $P$ -values generated using logistic regression analysis in the African ancestry sample ( $n=3,700$ ). An additive model was used to assess the disease susceptibility impact of the minor (coded) allele at each position, while controlling for age, BMI, sex, ancestry, nursing home status, chemotherapy, diabetes, HIV, transplant medications, corticosteroids, and medium or high-risk antibiotic exposure as covariates. Genomic coordinates are displayed along the X-axis, and the negative logarithm of logistic regression  $P$ -values are displayed on the Y-axis. Each dot represents a SNV in the regression model, with associated  $P$ -values plotted accordingly. The dotted line represents the negative logarithm of the genome-wide significance threshold ( $P < 5 \times 10^{-8}$ ). Colors are used to distinguish between SNVs in adjacent chromosomes.

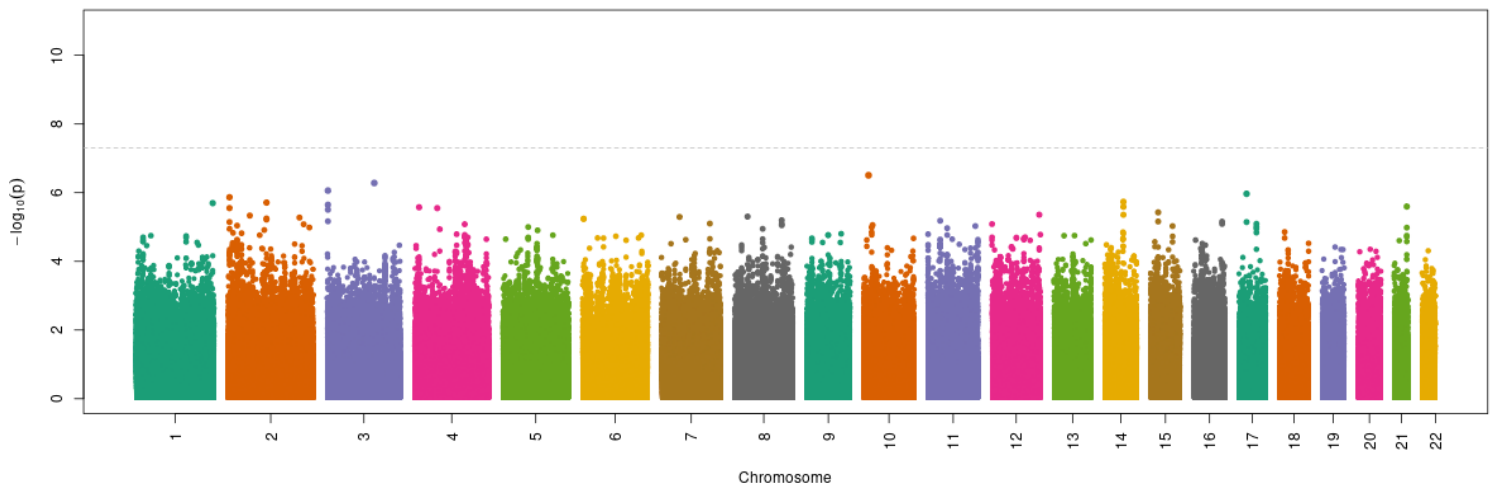



**Supplementary Figure S5.** Q-Q plot for logistic regression analysis in the African ancestry sample ( $n=3,700$ ,  $\lambda=1.00$ ). Expected  $P$ -values from a theoretical  $\chi^2$ -distribution are plotted on the X-axis, and observed  $P$ -values for each SNV in the logistic regression model are plotted on the Y-axis. The red line represents the null hypothesis that the theoretical and observed  $P$ -values correspond with one another.

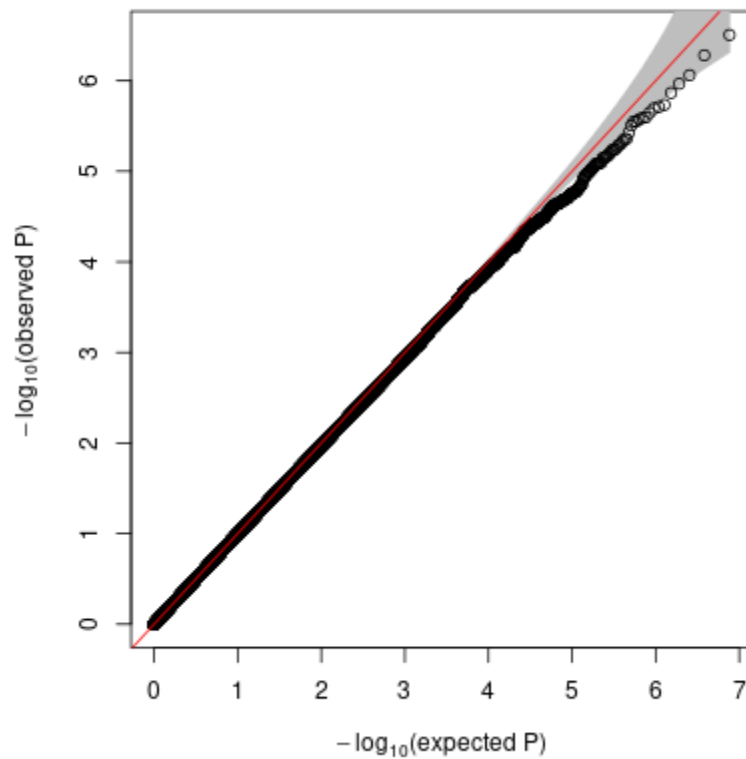

**Supplementary Figure S6.** Regional linkage disequilibrium (LD) plot of SNVs evaluated in the African-ancestry logistic regression analysis, using the African 1000 Genomes superpopulation as a reference group. Genomic coordinates spanning the HLA-DRB region and surrounding genes are shown on the X-axis in both subplots. Negative logarithms of  $P$ -values from the African-ancestry logistic regression analysis are shown on the Y-axis in the upper subplot, and annotated gene transcripts are distributed along the Y-axis in the lower subplot. Each dot represents a SNV in the regression model, with associated  $P$ -values plotted accordingly. SNVs in high LD with reference to the index SNV (rs68148149) are colored in red. The LD plot was generated with the LocusZoom<sup>67</sup> tool using default parameters and the 1000 Genomes Project 2014 AFR reference panel.

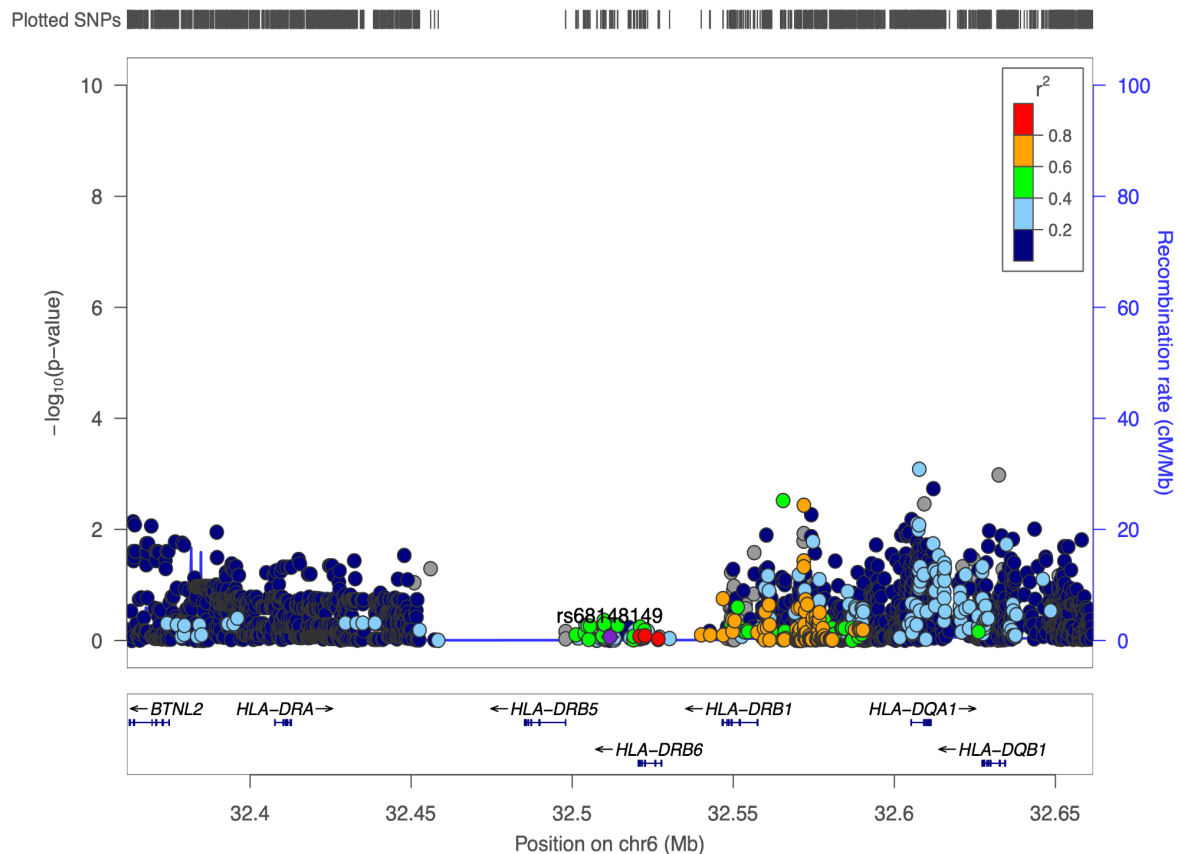

**Supplementary Figure S7.** Manhattan plot of  $P$ -values generated using logistic regression analysis in the European ancestry sample ( $n=14,620$ ), controlling for the index SNV identified in the joint and European-ancestry genome-wide logistic regression analyses (rs68148149). An additive model was used to assess the disease susceptibility impact of the minor (coded) allele at each position, while controlling for the index SNV, age, BMI, sex, ancestry, nursing home status, chemotherapy, diabetes, HIV, transplant medications, corticosteroids, and medium or high-risk antibiotic exposure as covariates. Genomic coordinates are displayed along the X-axis, and the negative logarithm of logistic regression  $P$ -values are displayed on the Y-axis. Each dot represents a SNV in the regression model, with associated  $P$ -values plotted accordingly. The dotted line represents the negative logarithm of the genome-wide significance threshold ( $P < 5 \times 10^{-8}$ ). Colors are used to distinguish between SNVs in adjacent chromosomes.

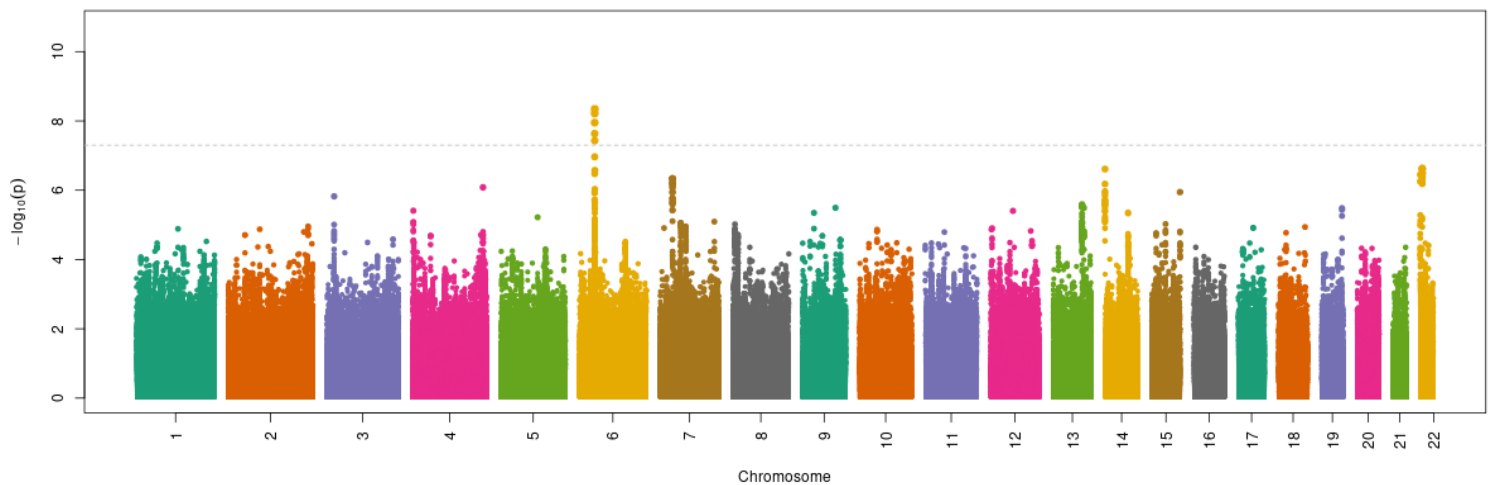

**Supplementary Figure S8.** Q-Q plot for logistic regression analysis in the European ancestry sample ( $n=14,620$ ,  $\lambda=1.02$ ), controlling for the index SNV identified in the joint and European-ancestry genome-wide logistic regression analyses (rs68148149). Expected  $P$ -values from a theoretical  $\chi^2$ -distribution are plotted on the X-axis, and observed  $P$ -values for each SNV in the logistic regression model are plotted on the Y-axis. The red line represents the null hypothesis that the theoretical and observed  $P$ -values correspond with one another.

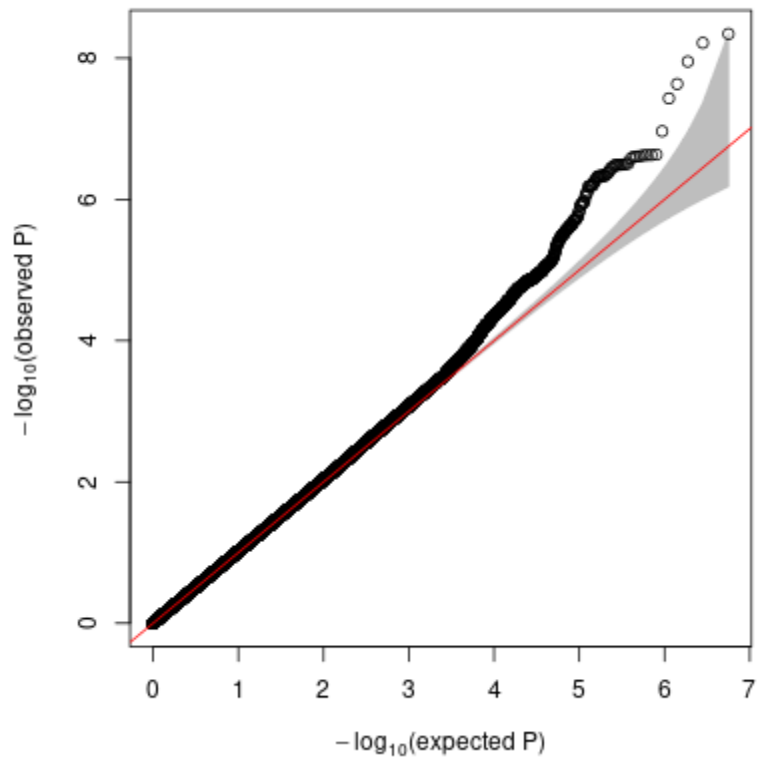

**Supplementary Figure S9.** Regional Manhattan plot of  $P$ -values generated using logistic regression analysis of SNVs in the chr6:32400001-32600000 region for 4 participant groups: participants with  $\geq 1$  copies of the DR51, 52 or 53 haplotype (top left,  $n=14,291$ ), participants with  $\geq 1$  copies of the DR51 haplotype (top right,  $n=4,130$ ), participants with  $\geq 1$  copies of the DR52 haplotype (bottom left,  $n=8,887$ ), and participants with  $\geq 1$  copies of DR53 haplotype (bottom right,  $n=7,863$ ). An additive model was used to assess the disease susceptibility impact of the minor (coded) allele at each position within each participant group, while controlling for age, BMI, sex, ancestry, nursing home status, chemotherapy, diabetes, HIV, transplant medications, corticosteroids, and medium or high-risk antibiotic exposure as covariates. Genomic coordinates are displayed along the X-axis, and the negative logarithm of logistic regression  $P$ -values are displayed on the Y-axis of each plot. Each dot represents a SNV in the regression model, with associated  $P$ -values plotted accordingly. The red line in each plot represents the negative logarithm of the genome-wide significance threshold ( $P < 5 \times 10^{-8}$ ), and the blue line represents a suggestive genome-wide significance threshold ( $P < 5 \times 10^{-6}$ ). Significantly associated SNVs from **Table 3** are colored in green.

DR51(+) or DR52(+) or DR53(+)  
(N = 14291)

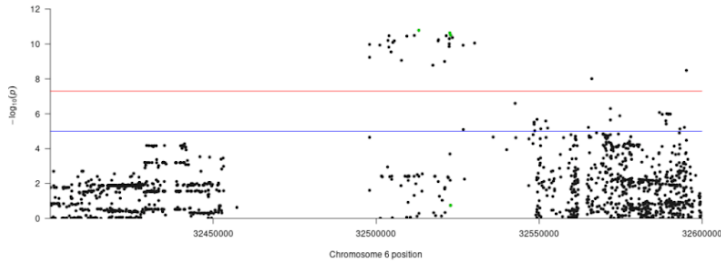

DR51(+), DR52(?), DR53(?)  
(N = 4130)

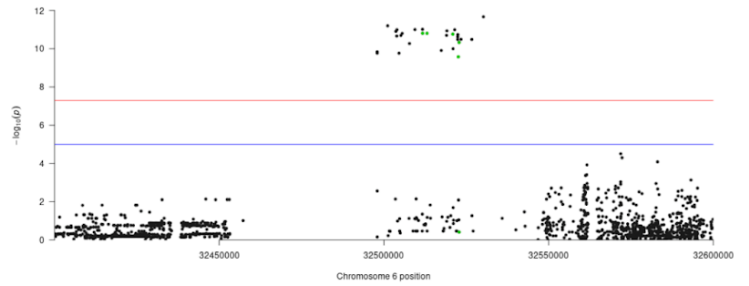

DR51(?), DR52(+), DR53(?)  
(N = 8887)

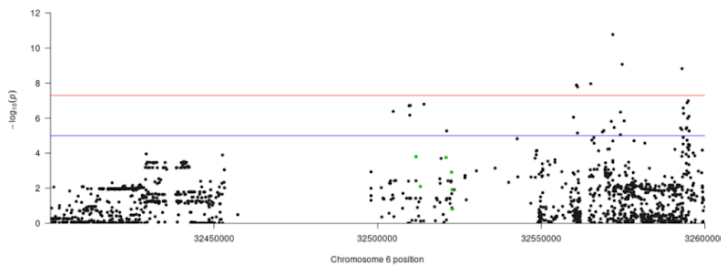

DR51(?), DR52(?), DR53(+)  
(N = 7863)

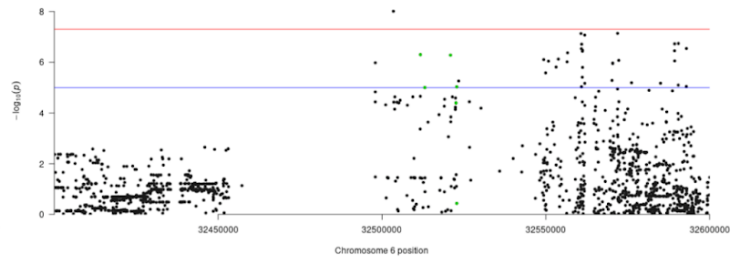

**Supplementary Figure S10.** Flowchart of regional Manhattan plots of  $P$ -values generated using logistic regression analysis of SNVs in the chr6:32400001-32600000 region, categorized by the following haplotype subsamples: DR51(+) (n=4130), DR15(+) (n=3791), DR16(+) (n=381), and DRB1\*15:01(+) (n=3608). An additive model was used to assess the disease susceptibility impact of the minor (coded) allele at each position within each participant group, while controlling for age, BMI, sex, ancestry, nursing home status, chemotherapy, diabetes, HIV, transplant medications, corticosteroids, and medium or high-risk antibiotic exposure as covariates. Genomic coordinates are displayed along the X-axis, and the negative logarithm of logistic regression  $P$ -values are displayed on the Y-axis of each plot. Each dot represents a SNV in the regression model, with associated  $P$ -values plotted accordingly. The red line in each plot represents the negative logarithm of the genome-wide significance threshold ( $P < 5 \times 10^{-8}$ ), and the blue line represents a suggestive genome-wide significance threshold ( $P < 5 \times 10^{-6}$ ). Significantly associated SNVs from **Table 3** are colored in green.

**DR51(+), DR52(?), DR53(?)**  
(N = 4130)

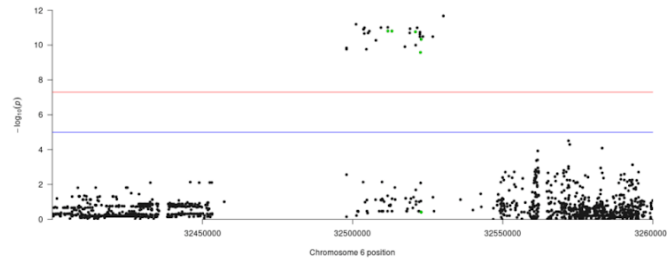

**DR15(+), DR16(?), DR52(?), DR53(?)**  
(N = 3791)

**DR15(?), DR16(+), DR52(?), DR53(?)**  
(N = 381)

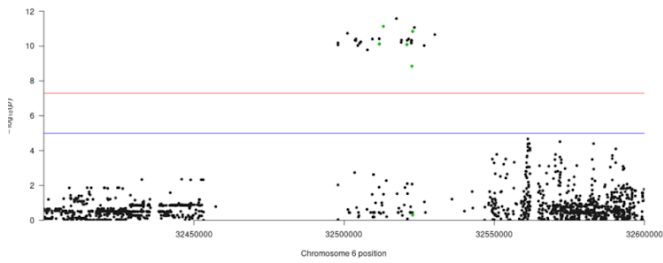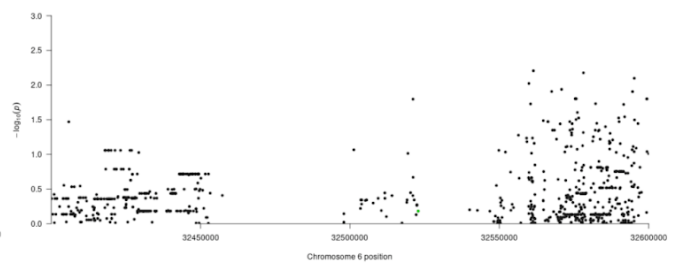

**DRB1\*15:01(+), DRB1\*15:02(?), DR16(?),  
DR52(?), DR53(?)**  
(N = 3608)

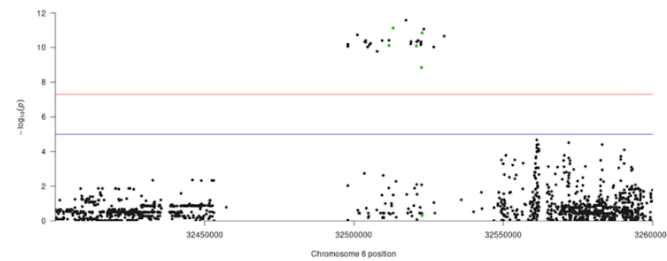



**Supplementary Figure S11.** Relational flowchart of the *HLA-DRB* haplotypes identified in the eMERGE *C. diff.* cohort.

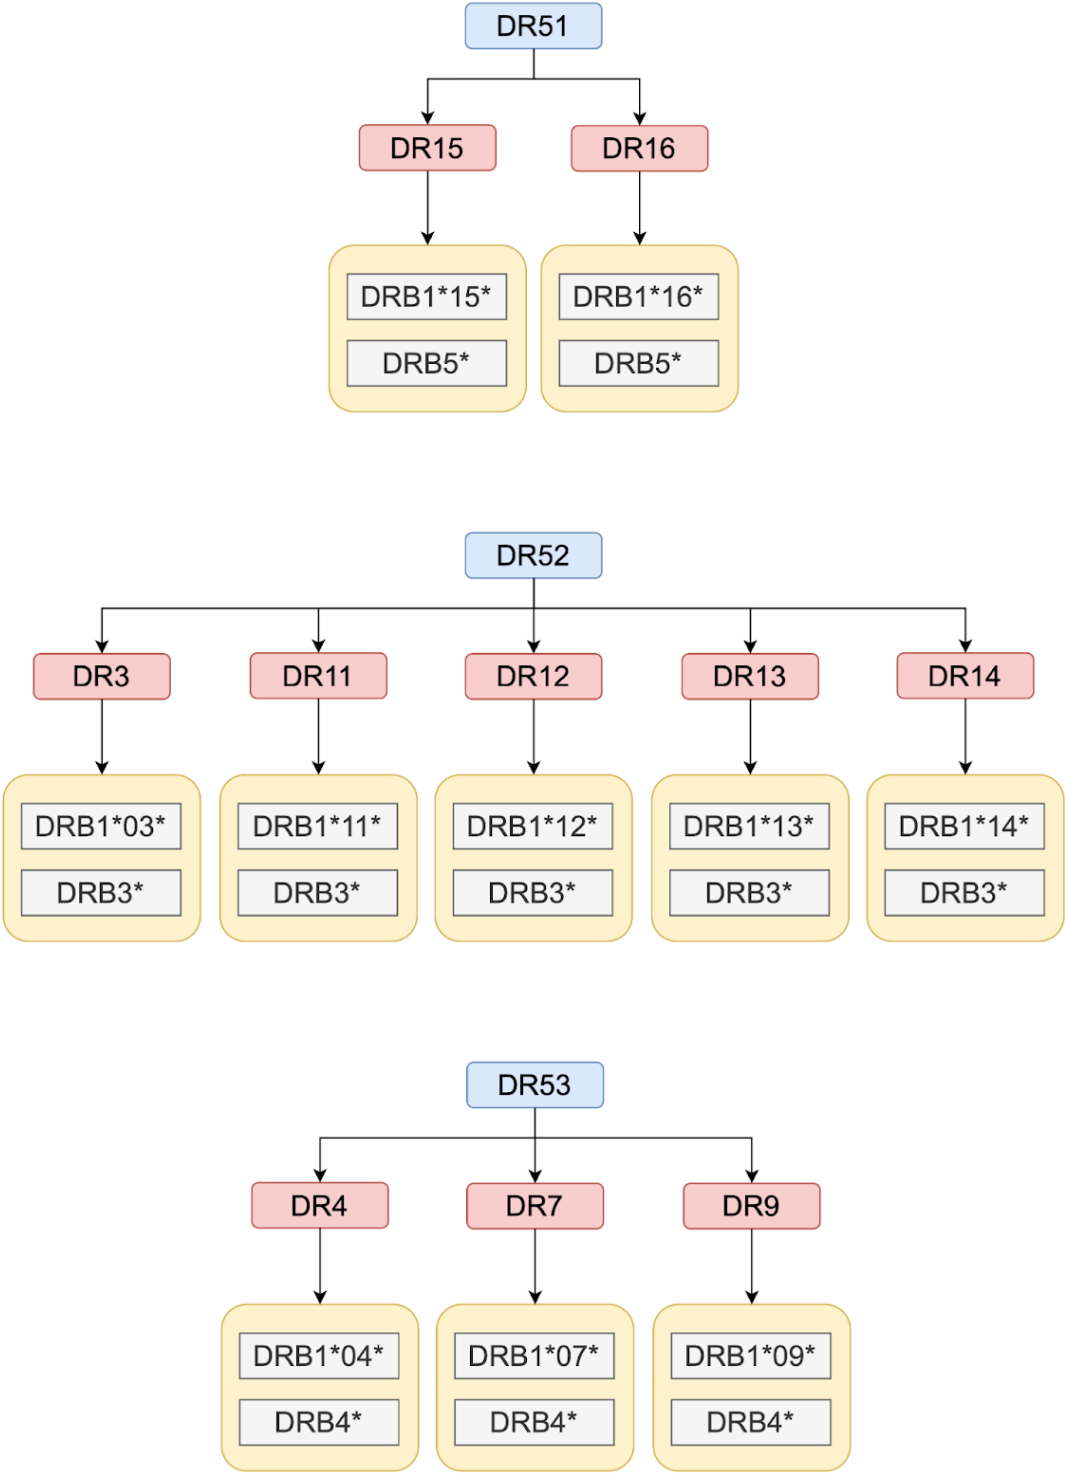

**Supplementary Figure S12.** Flowchart of coding allele frequencies (CAFs) of the index SNV identified in the joint and European-ancestry genome-wide logistic regression analyses (rs68148149) in different HLA-DR haplotype-enriched groups (DR51, DR52, and DR53).

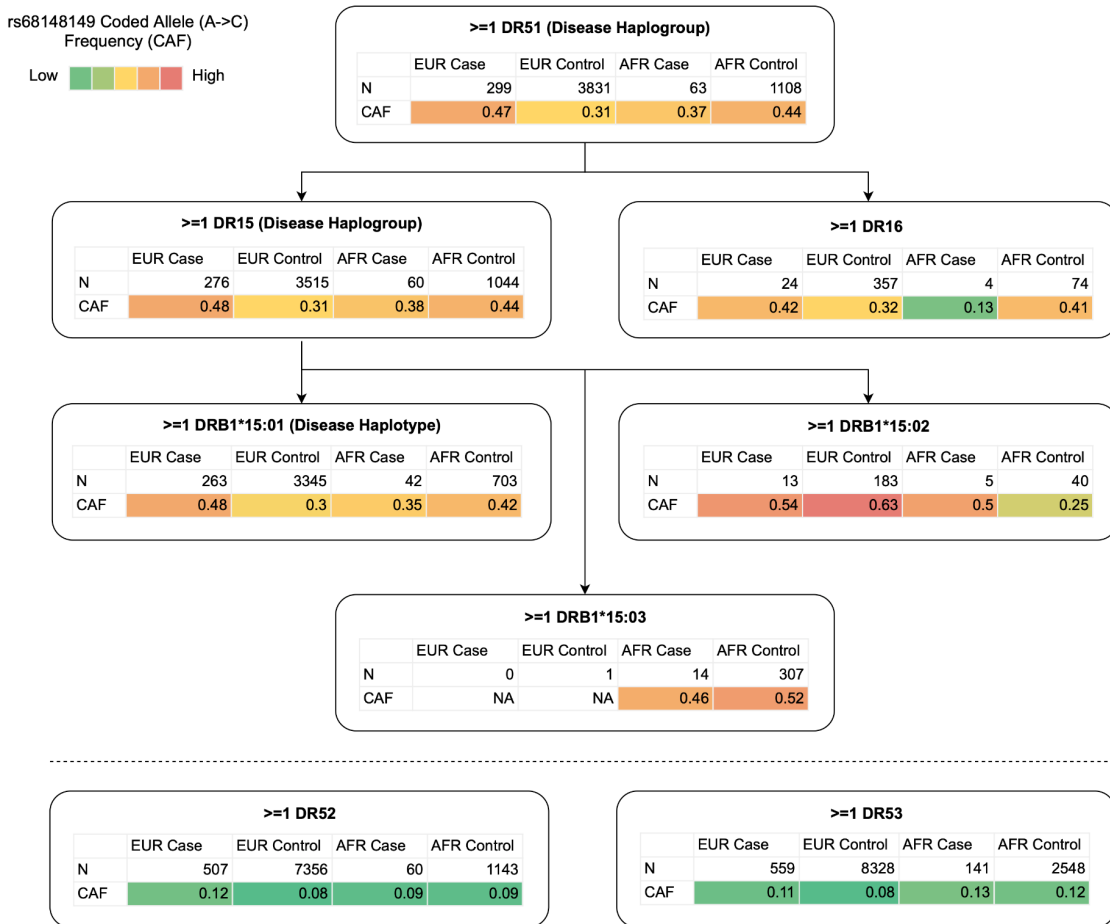

Supplement: 41598_2023_45649_MOESM1_ESM.pdf [file 41598_2023_45649_MOESM1_ESM.pdf]
